# Supplementary material for: Ce2PtGe3: a new ordered orthorhombic superstructure in the AlB2family with spin glass behavior
Source: Royal Society of Chemistry journal article supplement (doi:10.1039/c7qi00416h), 2017-01-01
Supplement: c7qi00416h1.pdf [file c7qi00416h1.pdf]

## **Ce<sub>2</sub>PtGe<sub>3</sub>: A New Ordered Orthorhombic Superstructure in the AlB<sub>2</sub> Family with Spin Glass Behavior**

**Sumanta Sarkar, Soumyabrata Roy, Deepti Kalsi, Sebastian C. Peter\***

New Chemistry Unit, Jawaharlal Nehru Centre for Advanced Scientific Research, Jakkur,  
Bangalore–560064, India

(Supporting Information)

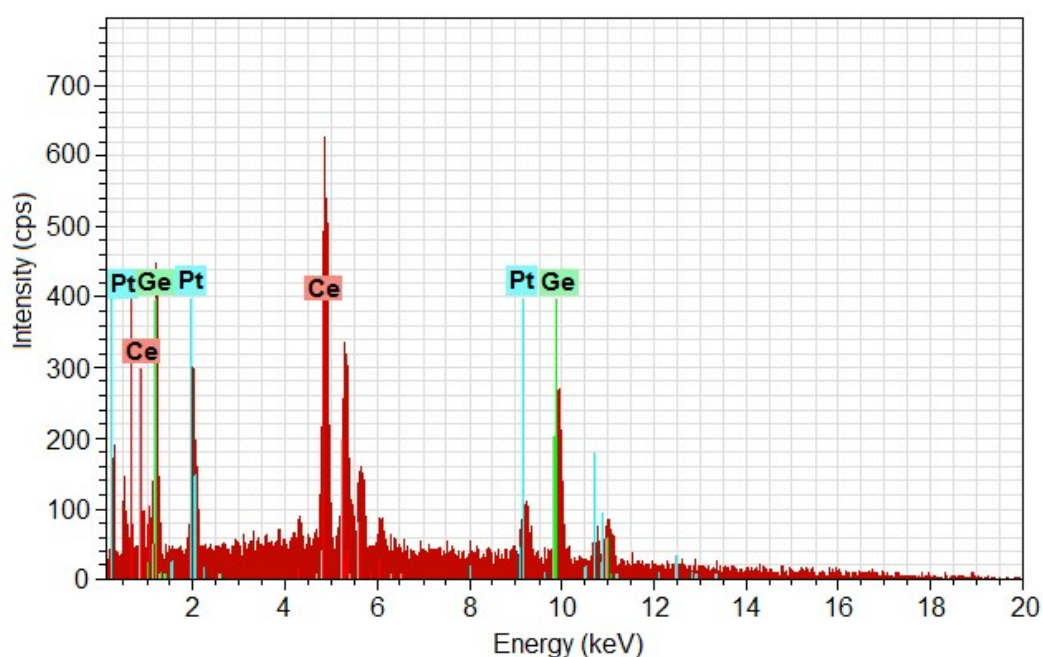

**Figure S1** Energy Dispersive X-ray absorption (EDX) spectrum on Ce<sub>2</sub>PtGe<sub>3</sub> sample.

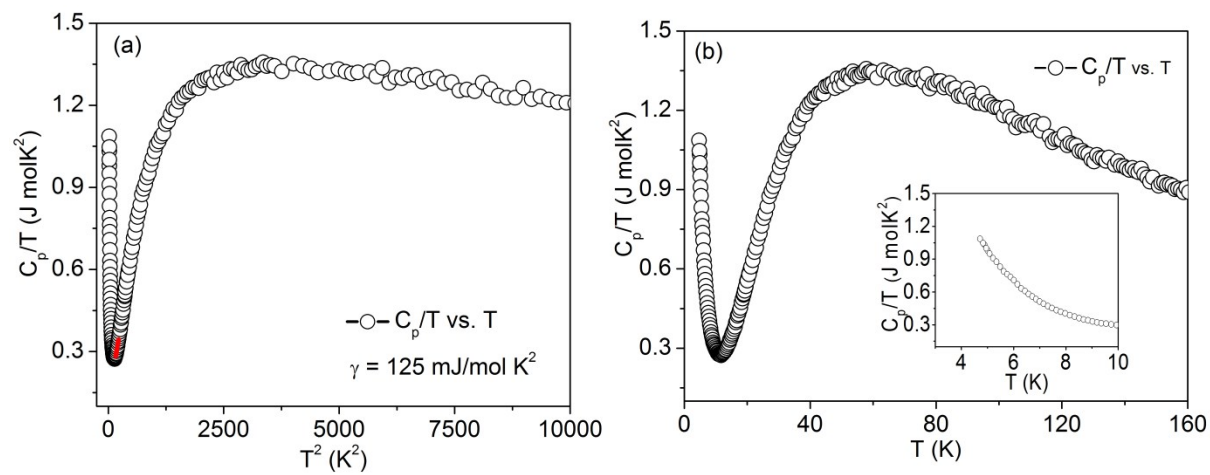

**Figure S2** Variation of  $C_p/T$  with (a)  $T$  and (b)  $T^2$  respectively. The inset of (b) shows an enlarged version at low temperature; at this range  $C_p$  does not scale as  $C_0 \log T$ .
